# Supplementary material for: RETRACTED ARTICLE: Impact of artificial intelligence on human loss in decision making, laziness and safety in education
Source: PubMed Central journal article supplement (PMC10251321; doi:10.1057/s41599-023-01787-8), 2023-06-09
Supplement: 41599_2023_1787_MOESM2_ESM.pdf [file 41599_2023_1787_MOESM2_ESM.pdf]

# University of Gawadar

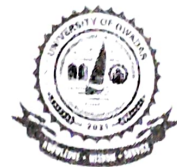

## ETHICS COMMITTEE CERTIFICATE OF APPROVAL

*This is to certify that*

**Project No:**

**Project Title: Impact of artificial intelligence on human loss in decision making, laziness and safety in education**

**Principal Researcher: Muhammad Irshad**

*Was considered by the Ethics Committee for Research on 1<sup>st</sup>-March-2022, meets the requirements of the National Statement on Ethical Conduct in Human Research (2007) and was APPROVED on 14-March-2021.*

It is the Principal Researcher's responsibility to ensure that all researchers associated with this project are aware of the conditions of approval and which documents have been approved.

*The Principal Researcher is required to notify the Secretary of the Ethics Committee, via amendment or progress report, of*

- Any significant change to the project and the reason for that change, including an indication of ethical implications (if any).
- Serious adverse effects on participants and the action taken to address those effects.
- Any other unforeseen events or unexpected developments that merit notification.
- The inability of the Principal Researcher to continue in that role, or any other change in research personnel involved in the project.
- A delay of more than 12 months in the commencement of the project; and,
- Termination or closure of the project.

*Additionally, the Principal Researcher is required to submit*

- A Progress Report on the anniversary of approval and on completion of the project.

### **Approved documents (Attach Questionnaire)**

#### **Survey Questionnaire**

I am a PhD student and a faculty member at University of Gawadar. . This purpose of this research is pure academic. The confidentiality of collected information is assured. No individual data will be reported.

Gender:            Male                                  Female  
Country of Origin    Pakistan                                  China  
Age in Years:            Less than 20                                  20 to 25                                  26 and above  
Qualification:            Undergraduate                                  Graduate                                  Post-Graduate

**Project No:**

**Project Title: Impact of artificial intelligence on human loss in decision making, laziness and safety in education**

| Questions                                                                                                    | Strongly Disagree | Disagree | Neutral | Agree | Strongly Agree |
|--------------------------------------------------------------------------------------------------------------|-------------------|----------|---------|-------|----------------|
| It is interesting to use AI.                                                                                 | 1                 | 2        | 3       | 4     | 5              |
| AI could make everything better.                                                                             | 1                 | 2        | 3       | 4     | 5              |
| AI is very important for developing society                                                                  | 1                 | 2        | 3       | 4     | 5              |
| AI is necessary for everyone                                                                                 | 1                 | 2        | 3       | 4     | 5              |
| AI produces better than bad.                                                                                 | 1                 | 2        | 3       | 4     | 5              |
| I think AI makes life more convenient.                                                                       | 1                 | 2        | 3       | 4     | 5              |
| AI helps me solve problems in real life.                                                                     | 1                 | 2        | 3       | 4     | 5              |
| How easy or difficult was the PROCESS of trying to find an answer?                                           | 1                 | 2        | 3       | 4     | 5              |
| I believe there is a good match between my decision and the decision support technology.                     | 1                 | 2        | 3       | 4     | 5              |
| I believe the decision support technology is not well suited for my decision.                                | 1                 | 2        | 3       | 4     | 5              |
| I believe there is an excellent fit between my decision and the decision support technology.                 | 1                 | 2        | 3       | 4     | 5              |
| I believe there is a mismatch between the decision I've made and the decision to support technology          | 1                 | 2        | 3       | 4     | 5              |
| Seeing what to do but don't want to do it                                                                    | 1                 | 2        | 3       | 4     | 5              |
| Postponing what should be done until the end                                                                 | 1                 | 2        | 3       | 4     | 5              |
| I avoid more complex jobs, affairs, or assignments                                                           | 1                 | 2        | 3       | 4     | 5              |
| Put aside work/homework and do what you like to do first. (For example: play a game first, then do business) | 1                 | 2        | 3       | 4     | 5              |
| By using AI, I am experiencing financial loss                                                                | 1                 | 2        | 3       | 4     | 5              |
| By using AI, I am Experiencing identity theft                                                                | 1                 | 2        | 3       | 4     | 5              |
| I am concerned about how companies collect and use personal information online.                              | 1                 | 2        | 3       | 4     | 5              |
| I always received junk emails or unwanted mail                                                               | 1                 | 2        | 3       | 4     | 5              |
| I am experiencing a feeling that my personal information may be misused                                      | 1                 | 2        | 3       | 4     | 5              |

The above Documents reviewed approved at the meeting.

Assistant Registrar  
University of Gwagwada



Secretary, Ethics Committee
